# Supplementary material for: Prevalence and bacteriology of culture-positive urinary tract infection among pregnant women with suspected urinary tract infection at Mbarara regional referral hospital, South-Western Uganda
Source: PubMed Central journal article supplement (PMC7903640; doi:10.1186/s12884-021-03641-8), 2021-02-23
Supplement: 12884_2021_3641_MOESM1_ESM.pdf [file 12884_2021_3641_MOESM1_ESM.pdf]

# A) Demographic characteristics

---

Record ID

---

---

Antenatal number

---

---

Serial number

---

---

Date of interview

---

---

Initials

---

---

Address

- Village
- Sub-county
- District

---

Village

---

---

Sub-county

---

---

District

---

## B) Social History

---

Age in years completed:

\_\_\_\_\_

---

Level of Education

- None
- Primary
- Secondary
- Tertiary

## C) Occupation

---

Occupation

- Un employed/ full time house wife
- Skilled employment
- Peasant farmer
- Student
- Others

---

Other occupation

---

## D) Marital Status

---

Marital Status

- Single
- Married / cohabiting
- Separated
- Divorced
- Widowed

## E) Religious Affiliation / faith

---

Religious Affiliation / faith

- Roman Catholic
- Protestant Church of Uganda
- Muslims
- Others

---

Other Religion

---

---

F)  Frequency of sexual intercourse during current pregnancy, number of times in a week:

---

## G) How do you clear your genitalia

---

How do you clear your genitalia

- Cleans genitals from back to front
- Cleans genitals from front to back

## H) Obstetric History

---

Obstetric History

- a) Gravity
- b) Parity
- c) Last normal menstruation period: (date/  
Month/year)
- d) Weeks of amenorrhea

---

Gravity

\_\_\_\_\_

---

Parity

\_\_\_\_\_

---

LNMP

\_\_\_\_\_

---

Weeks of amenorrhea

\_\_\_\_\_

# I) Antenatal visit

---

Antenatal visit

- 1st visit
- 2nd visits
- 3rd visit
- 4th visit
- others specify

---

Other Antenatal visits

---



## J) Previous history of UTI

---

Have you ever been told that you're suffering from UTI before this pregnancy?

- Yes  
 No

---

Did you have any of the following symptoms before this pregnancy, frequency of micturition, pain on passing urine, lower abdominal pain, loin pain

- Yes  
 No

## K) Complication encountered in this pregnancy

---

About micturition (in the last 2 weeks)

---

Painful / burning

- Yes  
 No

---

Increased frequency

- Yes  
 No

---

Urgency of passing urine

- Yes  
 No

---

Urine has changed color

- Yes  
 No

---

If yes, what is the color of urine

- Dark  
 Yellow  
 Reddish  
 Whitish  
 Others specify

---

Other color of urine

---

---

Amount of urine passed since you became sick

- Same  
 Reduced  
 Increased

---

Any history of abnormal vaginal discharge

- Yes  
 No

---

What is the color of the discharge

- Pus-like  
 Milk-like  
 Blood like  
 Others (specify)

---

History of lower abdominal pain

- Yes  
 No

---

Fever

- Yes  
 No

---

Vomiting

- Yes  
 No

---

If yes to any of the above symptoms, have you suffered from similar illness before in this pregnancy?

- Yes  
 No

---

If yes did you get treatment for it?

- Yes  
 No

---

If yes what kind of treatment did you get (Name of drugs and number of times drugs was taken in a day & duration of treatment?)

- Tablets  
 Injection  
 Capsules  
 All above

---

How long ago did you stop treatment?

- 7 days ago  
 7-14 days ago  
 14-21 days ago

---

Did you have similar conditions before in this current pregnancy?

- Yes  
 No

---

Any history of instrumentation (Catheter or speculum) in this current pregnant?

- Yes  
 No

---

Chronic conditions present?

- Diabetes  
 Sickle cell disease  
 Hypertension  
 HIV/AIDS  
 Others specify  
 None of the above

---

Other chronic conditions

---

---

Contraceptive methods ever used and when?

- Spermicidal cream/jelly  
 Diaphragm/cap  
 Injactaplan/Depo provera  
 Norplant  
 IUCD  
 Oral contraceptives  
 Non

# Laboratory form

Laboratory results for urine Date

---

Patient serial NO

---

Microscopy

- Yes  
 No

If yes

- Pus cells  
 No pus cells

Significant pus cell

- Yes (number of WBCS>5)  
 No

Bacterial in results

- Yes  
 No

Culture results

- Significant growth  
 No significant growth  
 Mixed growth

Gram test

- Positive  
 Negative

1, Micro organism

---

## G) Susceptibility

|                 | Sensitive                | Resistant                |
|-----------------|--------------------------|--------------------------|
| Amoxicillin     | <input type="checkbox"/> | <input type="checkbox"/> |
| Amoxiclav       | <input type="checkbox"/> | <input type="checkbox"/> |
| Ampicillin      | <input type="checkbox"/> | <input type="checkbox"/> |
| Gentamicin      | <input type="checkbox"/> | <input type="checkbox"/> |
| Erythromycin    | <input type="checkbox"/> | <input type="checkbox"/> |
| Nitrofurantoin  | <input type="checkbox"/> | <input type="checkbox"/> |
| Metronidazole   | <input type="checkbox"/> | <input type="checkbox"/> |
| Chloramphenicol | <input type="checkbox"/> | <input type="checkbox"/> |
| Ciprofloxacin   | <input type="checkbox"/> | <input type="checkbox"/> |
| Ceftazidimeclav | <input type="checkbox"/> | <input type="checkbox"/> |
| Cefuroxime      | <input type="checkbox"/> | <input type="checkbox"/> |
| Cefotaxime      | <input type="checkbox"/> | <input type="checkbox"/> |
| Ceftriaxone     | <input type="checkbox"/> | <input type="checkbox"/> |

|             |                          |                          |
|-------------|--------------------------|--------------------------|
| Imipenem    | <input type="checkbox"/> | <input type="checkbox"/> |
| Methicillin | <input type="checkbox"/> | <input type="checkbox"/> |

---

If gram Negative, is it ESBL?  Yes  
 No

---

If S.aureus, is it MRSA?  Yes  
 No
